# Supplementary material for: Assessing cross-resistance within the pyrethroids in terms of their interactions with key cytochrome P450 enzymes and resistance in vector populations
Source: PubMed Central journal article supplement (PMC7893915; doi:10.1186/s13071-021-04609-5), 2021-02-18
Supplement: 13071_2021_4609_MOESM1_ESM.pdf [file 13071_2021_4609_MOESM1_ESM.pdf]

**Additional file 1****1. Preparation of *An. gambiae* CYP6Z3 and cloning**

Total RNA was extracted with Arcturus PicoPure Kit (Applied Biosystems, USA) from ten adult *An. gambiae* mosquitoes from the Kisumu strain [1]. Complementary DNA was prepared using Superscript III (Invitrogen) with an oligo (dT)<sub>20</sub> primer and used as a template for amplifying full-length *AgCyp6z3* with KOD DNA polymerase (Merk Chemicals). The gene-specific primers used in these high-fidelity PCRs (Table S1) were designed according to the reference *An. gambiae* PEST CYP6Z3 genome sequence (Accession number AY193727). The PCR product was ligated into pGEM T-easy vector (Promega) and sequenced on both strands. Consistent with the high frequency of polymorphism in *An. gambiae* P450s [2](Martin Nature Ref) there were 36 single nucleotide polymorphism (SNPs) compared with the reference sequence, of which three produced amino acid changes, S209G, W396L, and H411Y. For expression, the *ompA* leader sequence (*ompA*) was engineered onto the amino-terminus of the *AgCyp6z3* gene to direct the P450 into the *E. coli* outer membrane during expression as previously described [3, 4]. The *ompA*-leader was fused to *AgCyp6z3* cDNA in frame with *AgCyp6z3* initiation codon by fusion PCR using High fidelity Phusion polymerase (Scientific). The *ompA AgCyp6z3* fusion was flanked at the 5' and 3' ends with NdeI and EcoRI, respectively for ligation into NdeI/EcoRI linearised pB13 (pCWori+).

**Table S1. Primers used for amplification of CYP6Z3 and *in vitro* functional characterisation**

| Primer                       | Sequence (5'-3')                                             |
|------------------------------|--------------------------------------------------------------|
| CYP6Z3_forward               | ATGGCTGTTTACACTCTCGCGCTCGT                                   |
| CYP6Z3_reverse               | TCGAATTCTCAGCATCTATGTTCTACGCGC                               |
| <i>ompA</i> +2 Forward       | GGAATTCCATATGAAAAAGACAGCTATCGCG                              |
| <i>ompA</i> +2 CYP6Z3 fusion | CGCCACGAGCGCGAGAGTGTAACAGCCATCGGAGCGGCCTGCG<br>CTACGGTAGCGAA |

**2. Preparation of membranes expressing P450 and AgCPR**

To express functional P450, *AgCyp6z3* cloned into pB13 plasmid was co-transformed into *E. coli* JM109 cells with *An. gambiae* NADPH-cytochrome P450 reductase (*AgCPR-pACYC*). The P450 and the *AgCPR* were previously fused with *ompA* and *pelB* leader sequences respectively to direct the expressed proteins to the inner bacterial periplasm in order to form functional monooxygenase complex [3, 5, 6]. For P450 production, 200 mL *E. coli* cultures in Terrific Broth were incubated at 21°C with shaking at 120 RPM for 18–24 h after induction with 1 mM IPTG. Following expression, *E. coli* membranes containing CYP6Z3 were isolated and P450 and AgCPR content measured as previously described [3, 7]. Samples were stored in aliquots of 100 µL at –80°C. *An. gambiae* cytochrome *b5* was prepared as described previously to supplement enzyme reactions at an 8:1 M ratio, *b5*: P450 [4].

**3. Inhibition screening of pyrethroids.**

Inhibition screening of pyrethroid inhibitors and IC<sub>50</sub> calculations carried out according Yunta *et al.* 2016[8]. Variable ligand concentrations were used for IC<sub>50</sub> calculations with diethoxy fluorescein [DEF] used at ~Km (0.2 and 0.5 µM) with 0.1 µM of CYP6Z3 and CYP6Z2 respectively. DEF reactions (200 µL) were carried out in at 25 °C in 50 mM KPi at pH 7.4 containing 1 mM glucose-6-phosphate (G6P), 0.1 mM NADP<sup>+</sup>, 0.25 mM MgCl<sub>2</sub>, and cytochrome *b5* at an 8:1 molar ratio, *b5*: P450. NADP<sup>+</sup> and G6P were excluded from the minus NADPH controls. Three replicates of positive and negative control reactions were run for each P450/substrate combination in opaque white 96-well (flat-based) plates in triplicate. The IC<sub>50</sub> fitting calculations were performed using GraphPad Prism 6. Data were fitted to the dose-response model and plots with R<sup>2</sup> < 0.95 were rejected.

## Results

The co-expression of *AgCYP6Z3* (AGAP008217) and *An. gambiae* NADPH-cytochrome P450 reductase (*AgCPR*) (AGAP000500) produced 8.25  $\mu\text{M}$  P450 as measured by  $\text{Fe}^{2+}$ -CO vs  $\text{Fe}^{2+}$  difference spectra [9] in membranes (Fig S1). The P450 reductase activity was in the range of 18.04 – 29.47 nmol/min/mg protein.

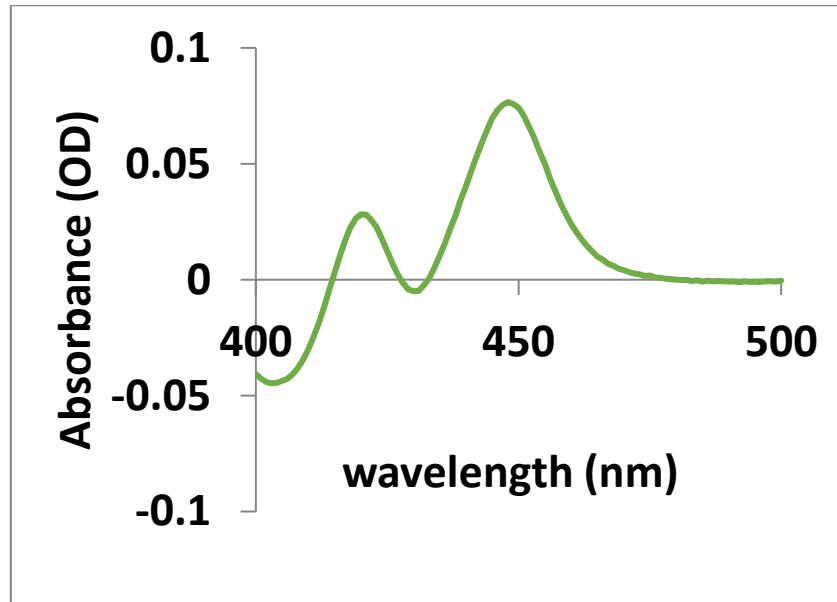

**Fig. S1.**  $\text{Fe}^{2+}$ -CO vs.  $\text{Fe}^{2+}$  difference spectrum of *E. coli* membranes expressing *AgCYP6Z3*.

| Insecticide            | CYP6M2           | CYP6P3           | CYP6P9a          | CYP6P2            | CYP9J5            | CYP6Z3 | CYP6Z2            | Mean across P450s |
|------------------------|------------------|------------------|------------------|-------------------|-------------------|--------|-------------------|-------------------|
| Deltamethrin           | 4.2 <sup>a</sup> | 3.2 <sup>a</sup> | 2.6 <sup>a</sup> | 5.0 <sup>a</sup>  | 6.1 <sup>a</sup>  | 3.4    | 13.9 <sup>a</sup> | 5.5               |
| $\alpha$ -cypermethrin | 1.5 <sup>b</sup> | 2.6 <sup>b</sup> | 4.2 <sup>b</sup> | 9.8 <sup>b</sup>  | 13.5 <sup>b</sup> | 4.4    | 8.6               | 6.4               |
| Etofenprox             | 12 <sup>b</sup>  | 8.3 <sup>b</sup> | 8.1 <sup>b</sup> | 4.7 <sup>b</sup>  | 8 <sup>b</sup>    | 4.8    | 2.8               | 7.0               |
| $\lambda$ -Cyhalothrin | 6.6 <sup>b</sup> | 9.6 <sup>b</sup> | 3.7 <sup>b</sup> | 4.8 <sup>b</sup>  | 4.2 <sup>b</sup>  | 3.3    | 18.6              | 7.2               |
| Permethrin             | 8.1 <sup>a</sup> | 6.8 <sup>a</sup> | 5.7 <sup>a</sup> | 8.6 <sup>a</sup>  | 6.5 <sup>a</sup>  | 3.7    | 13.7 <sup>a</sup> | 7.6               |
| Bifenthrin             | 5.6 <sup>b</sup> | 3.5 <sup>b</sup> | 8.5 <sup>b</sup> | 10.7 <sup>b</sup> | 2.5 <sup>b</sup>  | 17     | 20.7              | 9.8               |

<sup>a</sup> Published in Yunta *et al.* 2016[8] and <sup>b</sup> published in Yunta *et al.* 2019[10].

**Table S3. Pyrethroid metabolism by mosquito P450s**

| P450                 | % Insecticide depletion |                 |                 |                     |                        |                 |
|----------------------|-------------------------|-----------------|-----------------|---------------------|------------------------|-----------------|
|                      | Pyrethroids type I      |                 |                 | Pyrethroids type II |                        |                 |
|                      | Permethrin              | Etofenprox      | Bifenthrin      | Deltamethrin        | $\lambda$ -cyhalothrin | Cypermethrin    |
| CYP6M2 <sup>t</sup>  | 58.5 $\pm$ 2.2          | 68.8 $\pm$ 1.1  | 38.9 $\pm$ 1.6  | 55.4 $\pm$ 1.4      | 49.4 $\pm$ 0.5         | 36.8 $\pm$ 1.8  |
| CYP6P3 <sup>t</sup>  | 100.0 $\pm$ 0.0         | 99.8 $\pm$ 0.3  | 76.7 $\pm$ 0.3  | 98.2 $\pm$ 0.2      | 83.3 $\pm$ 15.4        | 98.4 $\pm$ 0.1  |
| CYP6P9a <sup>t</sup> | 87.8 $\pm$ 0.7          | 98.5 $\pm$ 0.2  | 53.4 $\pm$ 1.6  | 97.0 $\pm$ 0.2      | 67.1 $\pm$ 3.1         | 89.5 $\pm$ 2.7  |
| Mean across P450s    | 82.1 $\pm$ 21.3         | 89.0 $\pm$ 17.5 | 56.3 $\pm$ 19.1 | 83.5 $\pm$ 24.2     | 66.6 $\pm$ 17.0        | 74.9 $\pm$ 33.3 |

<sup>t</sup>: Incubation time 2h; (mean  $\pm$  SD)

## References

1. Witzig, C., et al., *Genetic mapping identifies a major locus spanning P450 clusters associated with pyrethroid resistance in kdr-free Anopheles arabiensis from Chad*. Heredity, 2013. **110**(4): p. 389-397.
2. Miles, A., et al., *Genetic diversity of the African malaria vector Anopheles gambiae*. Nature, 2017. **552**(7683): p. 96-+.
3. McLaughlin, L., et al., *Characterization of inhibitors and substrates of Anopheles gambiae CYP6Z2*. Insect molecular biology, 2008. **17**(2): p. 125-135.
4. Stevenson, B.J., et al., *Cytochrome P450 6M2 from the malaria vector Anopheles gambiae metabolizes pyrethroids: Sequential metabolism of deltamethrin revealed*. Insect biochemistry and molecular biology, 2011. **41**(7): p. 492-502.
5. Pritchard, M.P., et al., *Functional co-expression of CYP2D6 and human NADPHcytochrome P450 reductase in Escherichia coli*. Pharmacogenetics and Genomics, 1998. **8**(1): p. 33-42.
6. Pritchard, M.P., et al., *A General Strategy for the Expression of Recombinant Human Cytochrome P450s in Escherichia coli Using Bacterial Signal Peptides: Expression of CYP3A4, CYP2A6, and CYP2E1*. Archives of biochemistry and biophysics, 1997. **345**(2): p. 342-354.
7. Stevenson, B.J., et al., *Pinpointing P450s associated with pyrethroid metabolism in the dengue vector, Aedes aegypti: developing new tools to combat insecticide resistance*. PLoS neglected tropical diseases, 2012. **6**(3): p. e1595.
8. Yunta, C., et al., *Pyriproxyfen is metabolized by P450s associated with pyrethroid resistance in An. gambiae*. Insect Biochemistry and Molecular Biology, 2016. **78**: p. 50-57.

Moyes CL *et al.*

9. Omura, T. and R. Sato, *The Carbon Monoxide-Binding Pigment of Liver Microsomes. II. Solubilization, Purification, and Properties.* J Biol Chem, 1964. **239**: p. 2379-85.
10. Yunta, C., et al., *Cross-resistance profiles of malaria mosquito P450s associated with pyrethroid resistance against WHO insecticides.* Pesticide Biochemistry and Physiology, 2019. **161**: p. 61-67.
