# Supplementary material for: Assessing cross-resistance within the pyrethroids in terms of their interactions with key cytochrome P450 enzymes and resistance in vector populations
Source: PubMed Central journal article supplement (PMC7893915; doi:10.1186/s13071-021-04609-5), 2021-02-18
Supplement: 13071_2021_4609_MOESM2_ESM.pdf [file 13071_2021_4609_MOESM2_ESM.pdf]

**Additional File 2. Further results for correlations found in susceptibility test results from wild vector populations**

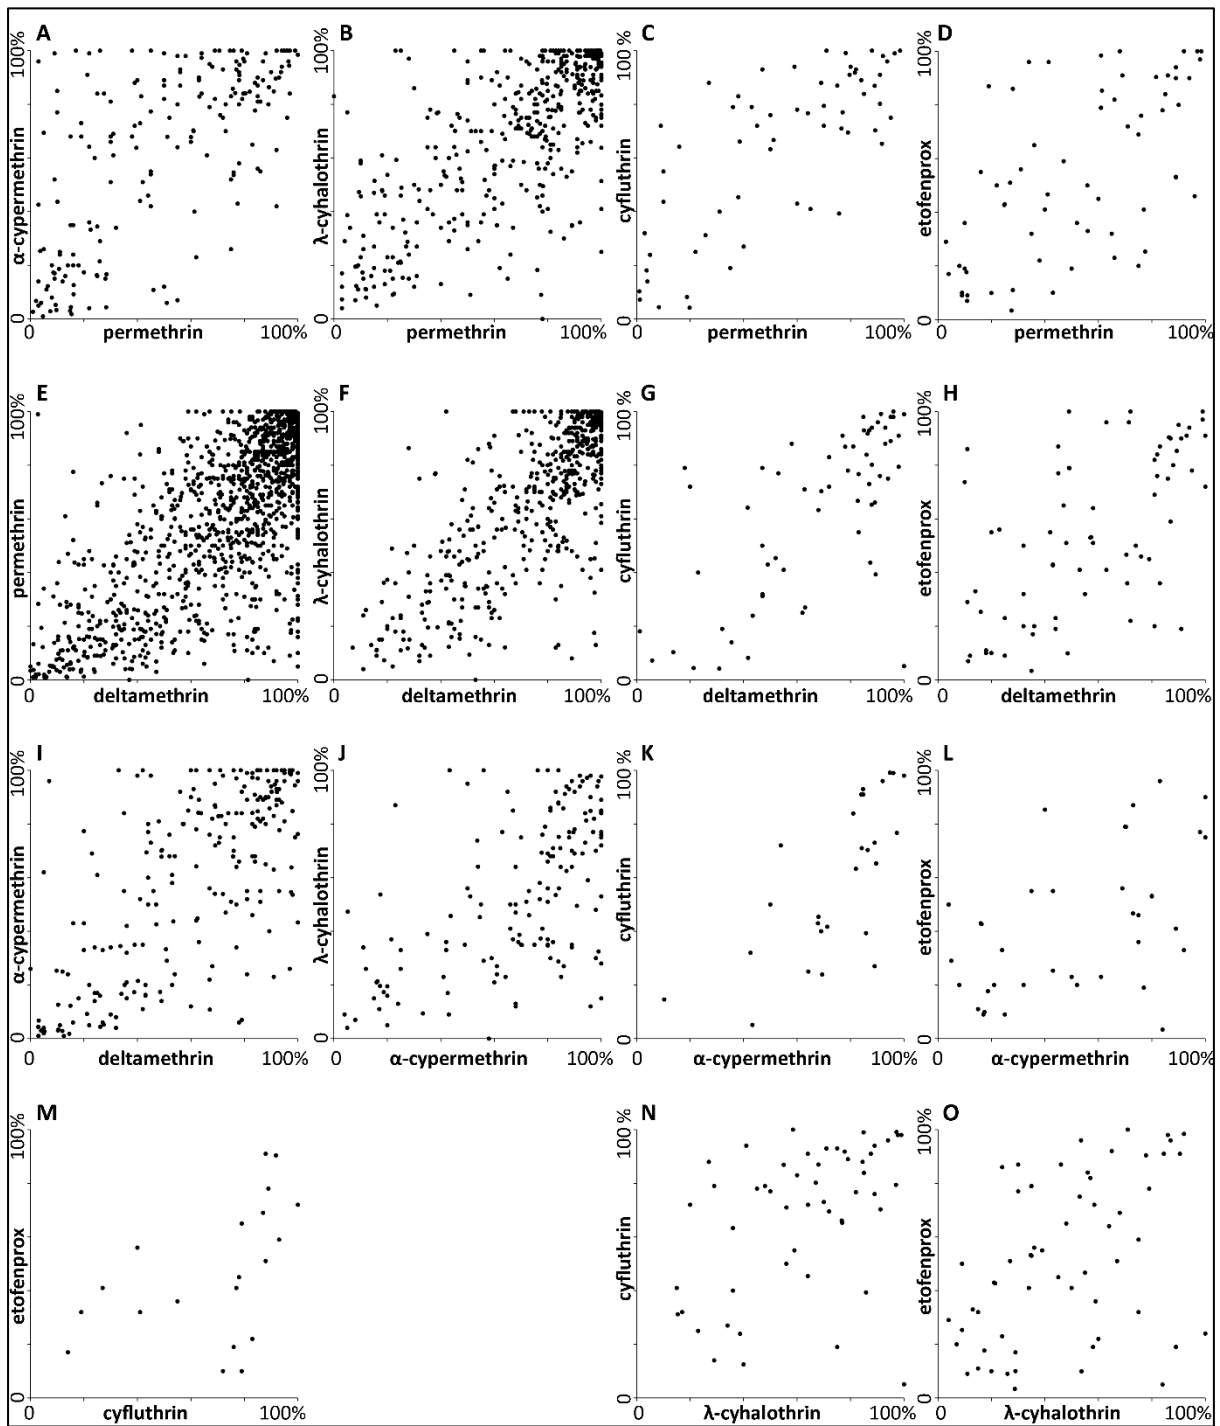

**Figure S2.** The distributions of paired pyrethroid susceptibility test mortality values for *An. gambiae* s.l. Each point represents the results from a single *An. gambiae* s.l. sample that was subdivided between susceptibility tests for two different pyrethroids to give a pair of percent mortality values.

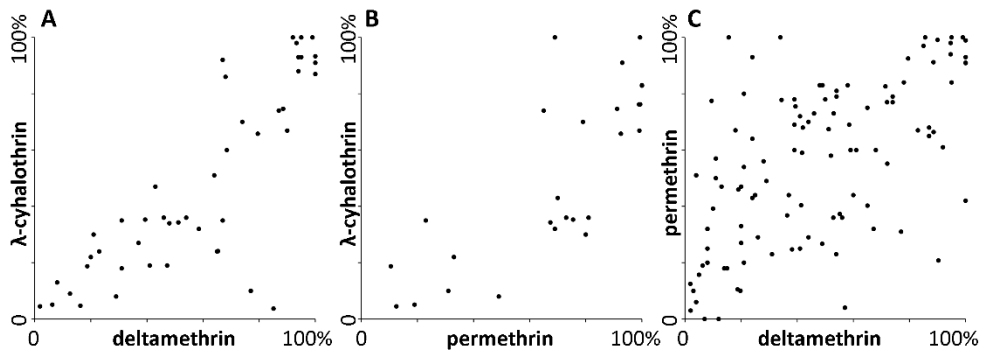

Figure S3. The distributions of paired pyrethroid susceptibility test mortality values for the *An. funestus* subgroup.

**Figure S4. The distributions of paired pyrethroid susceptibility test mortality values for four species.**

Each point represents the results for a single species from a mosquito sample that was subdivided between susceptibility tests for two different pyrethroids to give a pair of percent mortality values.

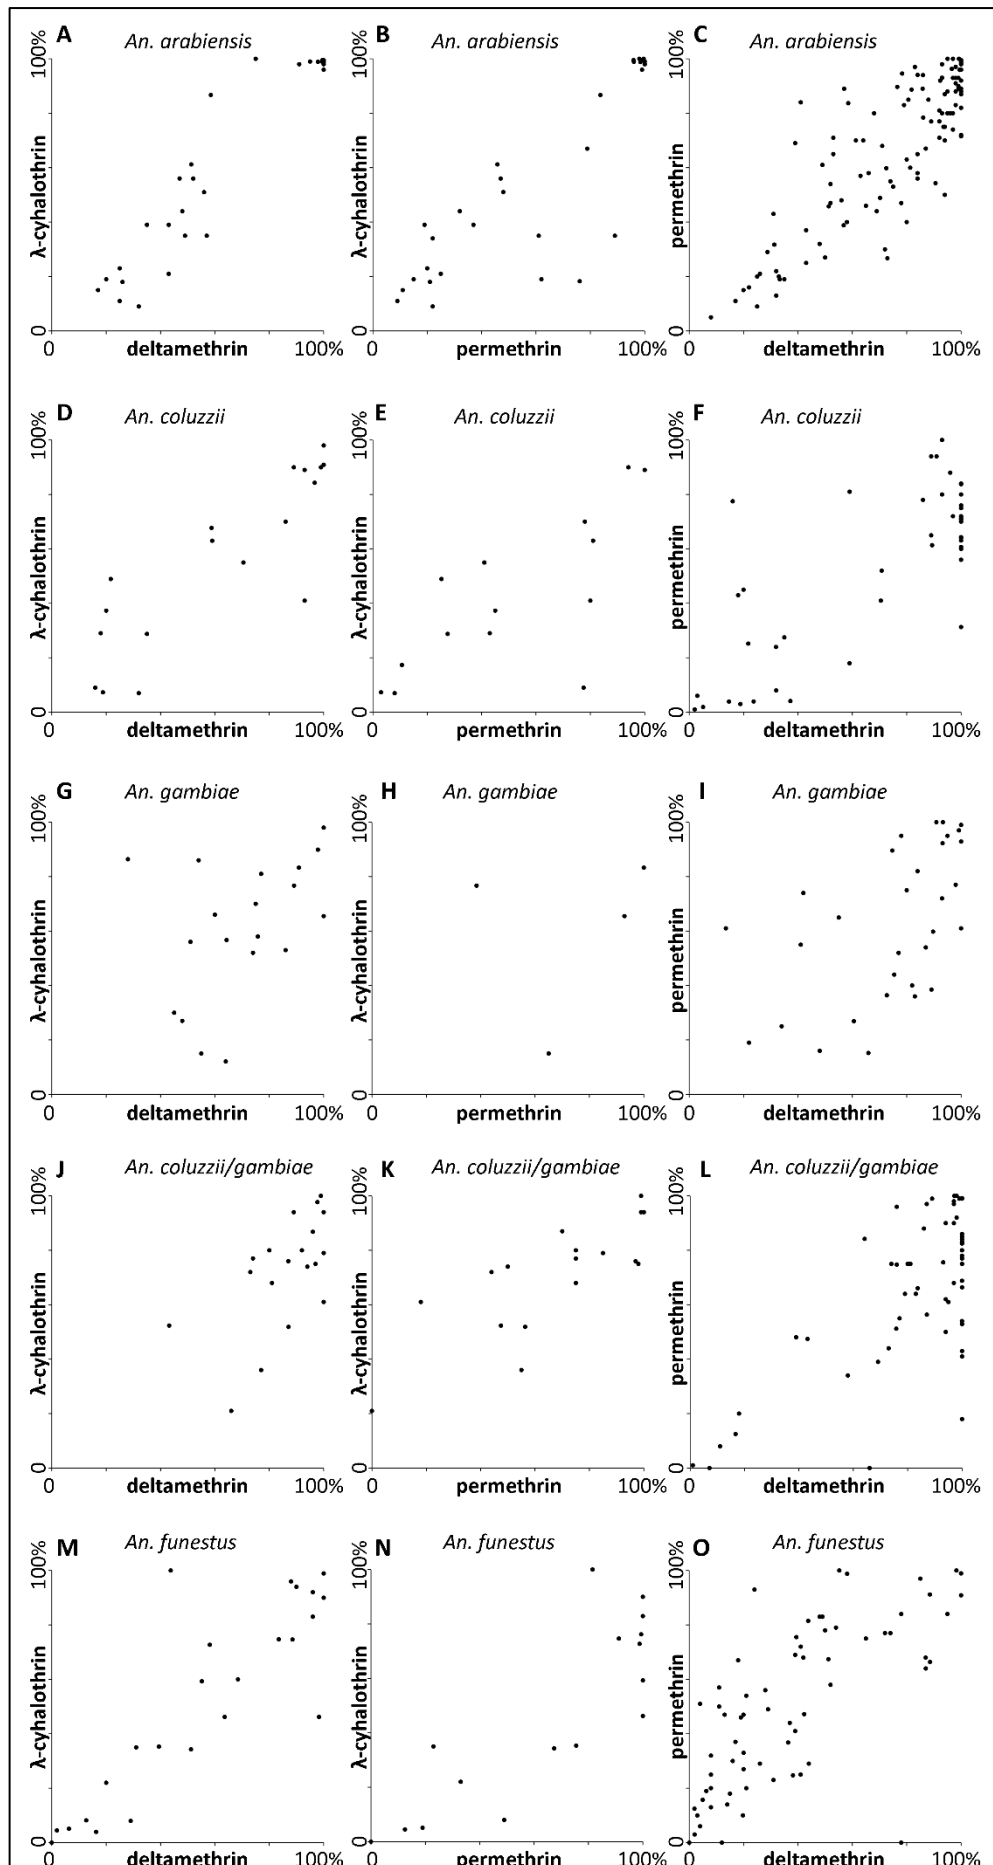

**Figure S5. The distributions of paired susceptibility test mortality values for four species exposed to deltamethrin and a non-pyrethroid insecticide.** Each point represents the results for a single species from a mosquito sample that was subdivided between two susceptibility tests for deltamethrin and a non-pyrethroid insecticide to give a pair of percent mortality values.

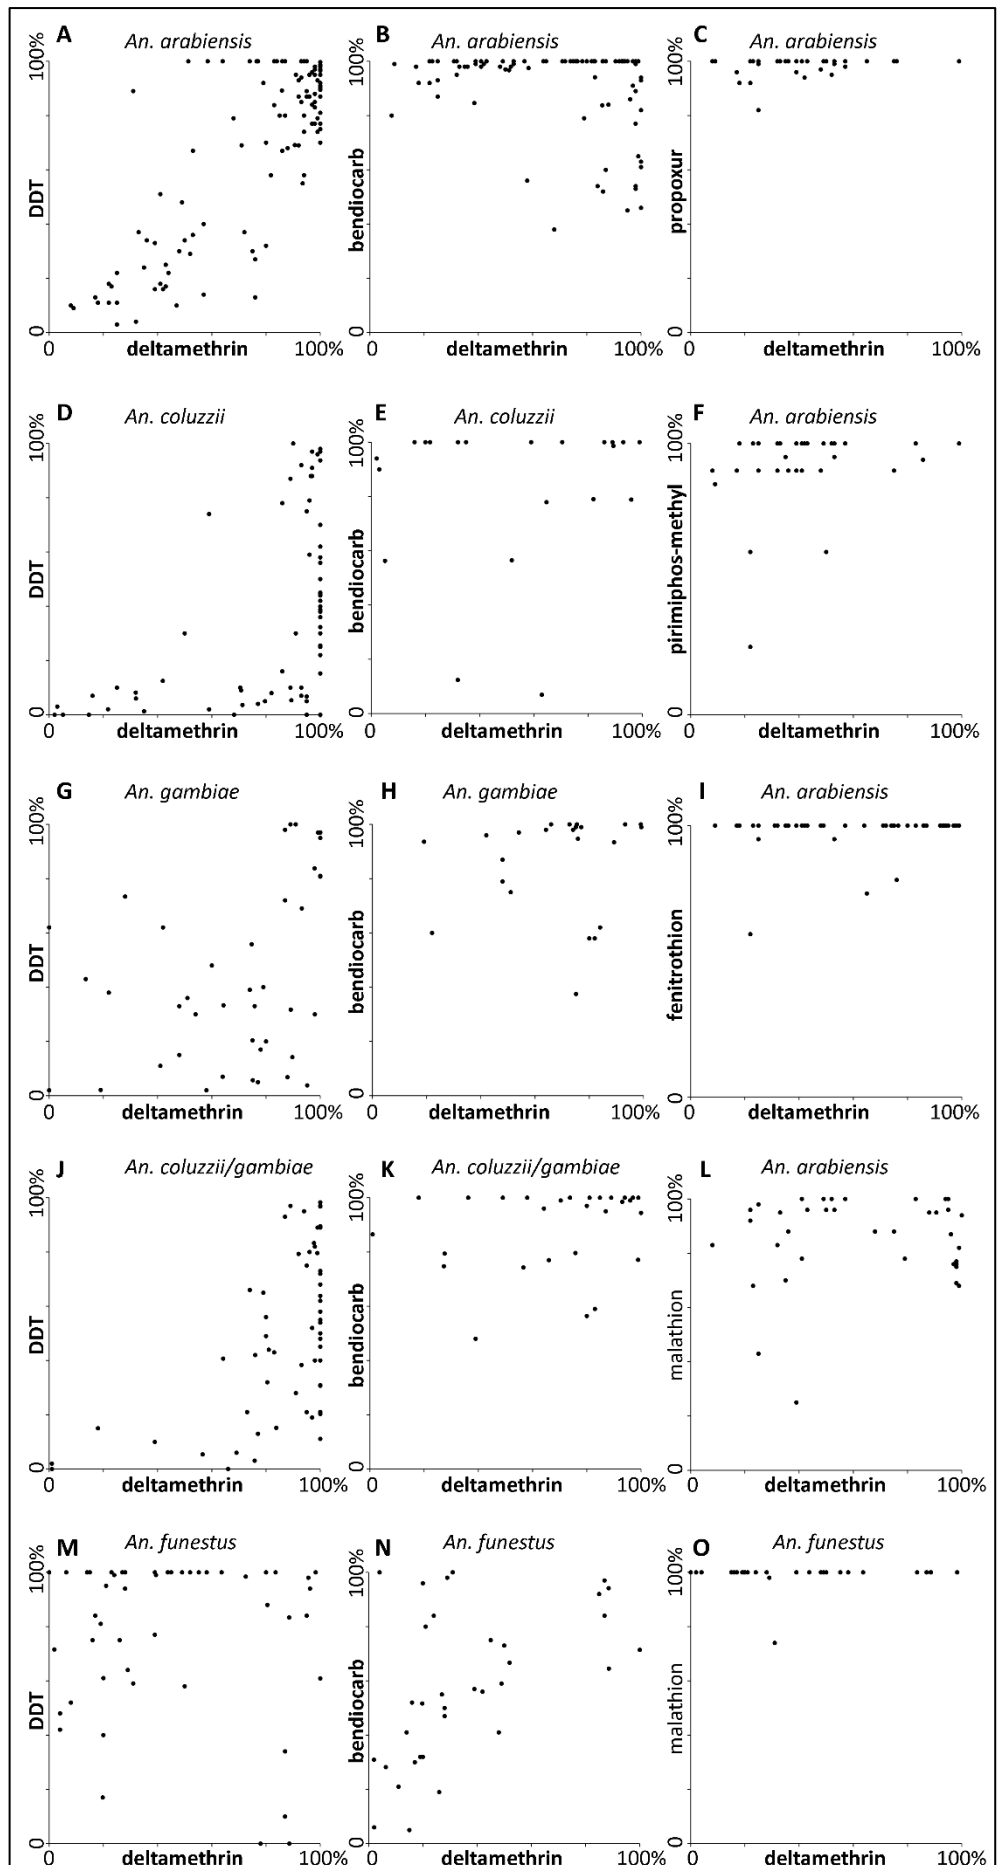

**Table S4. Correlations between resistance to deltamethrin and non-pyrethroid insecticides in four African malaria vector species**

| <b>Deltamethrin vs DDT</b>               | <b>N</b> | <b>Correlation</b>     |
|------------------------------------------|----------|------------------------|
| <i>Anopheles arabiensis</i>              | 107      | 0.808*                 |
| <i>Anopheles coluzzii</i>                | 69       | 0.506*                 |
| <i>Anopheles coluzzii/gambiae</i>        | 62       | 0.545*                 |
| <i>Anopheles gambiae</i>                 | 43       | 0.370 <sup>n.s.</sup>  |
| <i>Anopheles funestus</i>                | 48       | -0.071 <sup>n.s.</sup> |
| <b>Deltamethrin vs bendiocarb</b>        |          |                        |
| <i>Anopheles arabiensis</i>              | 97       | -0.224 <sup>n.s.</sup> |
| <i>Anopheles coluzzii</i>                | 22       | 0.133 <sup>n.s.</sup>  |
| <i>Anopheles coluzzii/gambiae</i>        | 28       | 0.218 <sup>n.s.</sup>  |
| <i>Anopheles gambiae</i>                 | 22       | 0.073 <sup>n.s.</sup>  |
| <i>Anopheles funestus</i>                | 35       | 0.439 <sup>n.s.</sup>  |
| <b>Deltamethrin vs fenitrothion</b>      |          |                        |
| <i>Anopheles arabiensis</i>              | 55       | 0.170 <sup>n.s.</sup>  |
| <b>Deltamethrin vs malathion</b>         |          |                        |
| <i>Anopheles arabiensis</i>              | 37       | 0.084 <sup>n.s.</sup>  |
| <i>Anopheles funestus</i>                | 29       | 0.061 <sup>n.s.</sup>  |
| <b>Deltamethrin vs pirimiphos-methyl</b> |          |                        |
| <i>Anopheles arabiensis</i>              | 34       | 0.246 <sup>n.s.</sup>  |
| <b>Deltamethrin vs propoxur</b>          |          |                        |
| <i>Anopheles arabiensis</i>              | 34       | 0.249 <sup>n.s.</sup>  |

Significant results (at the 0.05 level with a Holm-Bonferroni correction) are denoted by \*. The term 'Anopheles coluzzii/gambiae' refers to mosquito samples that were undifferentiated between *An. coluzzii* and *An. gambiae*, or M and S forms, before they were recognised as two species. Non-significant results are denoted n.s.

**Figure S6. Comparisons between resistance to etofenprox and five other pyrethroids, measured using standard WHO susceptibility tests in (A) the *An. gambiae* complex and (B) the *An. funestus* subgroup.**

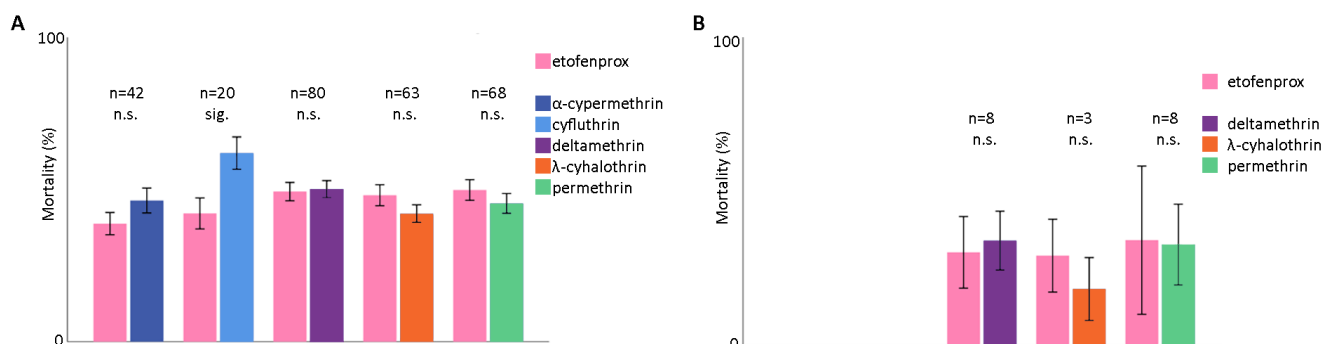

Significant (at the 0.05 level with a Holm-Bonferroni correction) results from a paired-sample t-test are denoted 'sig.', non-significant results are denoted 'n.s.', and 'n' is the number of pairs in each set.

### Deltamethrin vs Permethrin Resistance in Malaria Vector Complexes

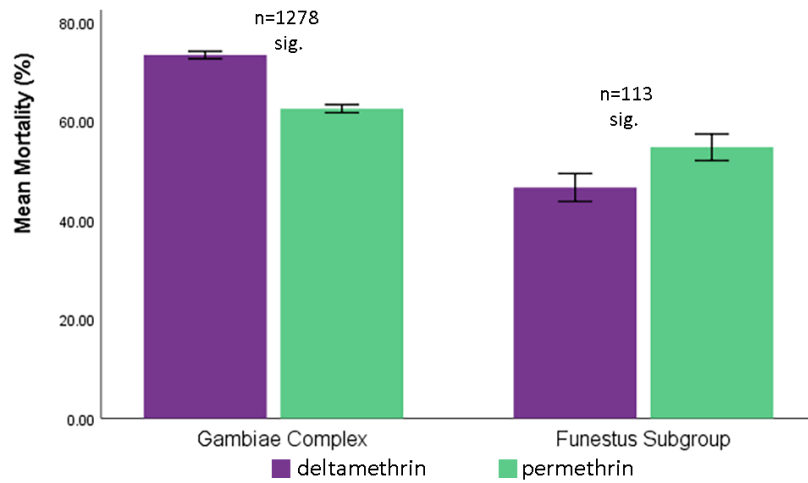

### Deltamethrin vs $\lambda$ -Cyhalothrin Resistance in Malaria Vector Complexes

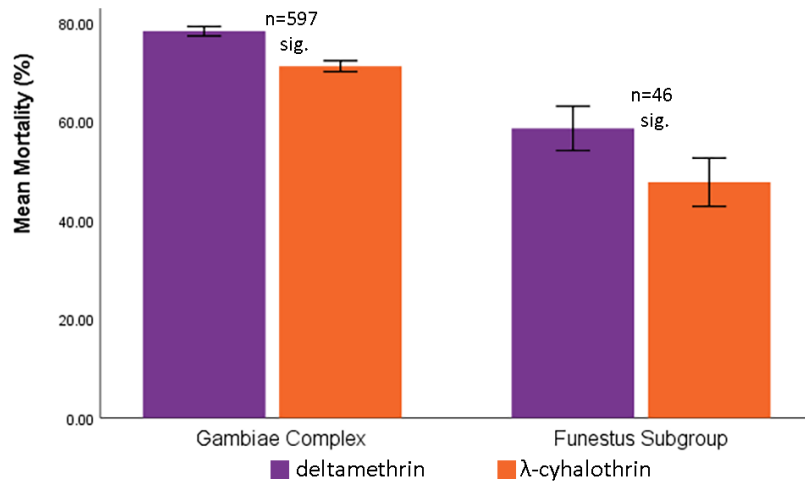

### Permethrin vs $\lambda$ -Cyhalothrin Resistance in Malaria Vector Complexes

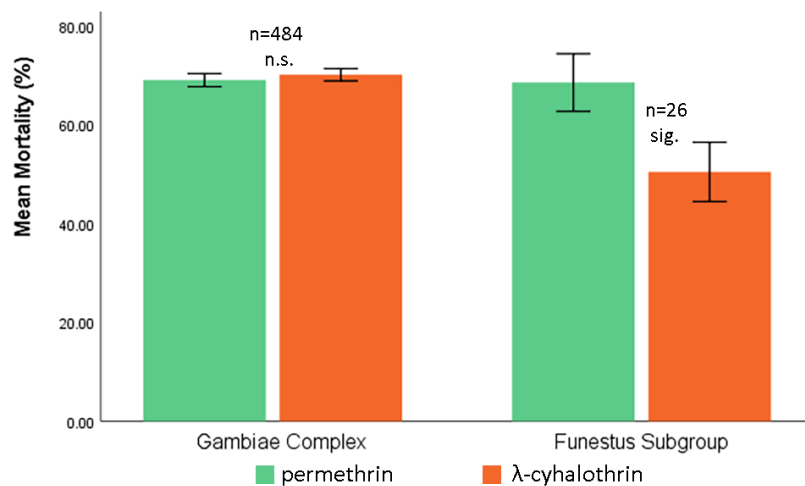

**Figure S7.** Comparison of resistance to three pyrethroids in the *An. gambiae* complex and *An. funestus* subgroup. Significant results (at the 0.05 level with a Holm-Bonferroni correction) from a paired-sample t-test are denoted 'sig.', non-significant results are denoted 'n.s.', and 'n' is the number of pairs in each set.

### Deltamethrin vs Permethrin Resistance in Malaria Vector Species

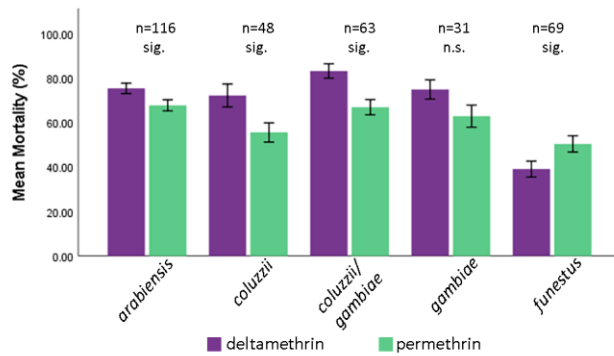

### Deltamethrin vs $\lambda$ -Cyhalothrin Resistance in Malaria Vector Species

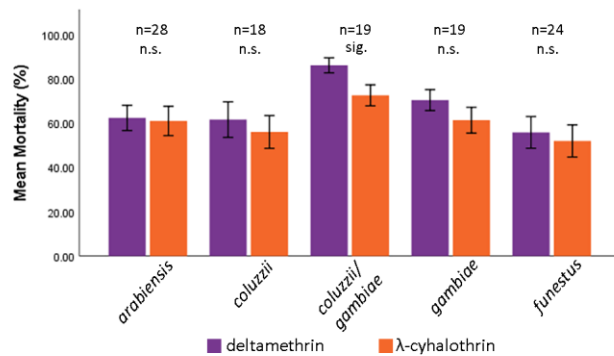

### Permethrin vs $\lambda$ -Cyhalothrin Resistance in Malaria Vector Species

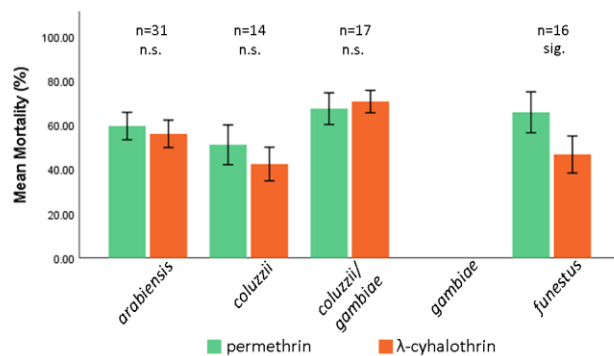

**Figure S8.** Comparison of resistance to three pyrethroids in four malaria vector species. Two species, *An. coluzzii* and *An. gambiae*, were previously classified as one and results for this former species are entitled 'coluzzii/gambiae'. Significant results (at the 0.05 level with a Holm-Bonferroni correction) from a paired-sample t-test are denoted 'sig.', non-significant results are denoted 'n.s.', and 'n' is the number of pairs in each set.

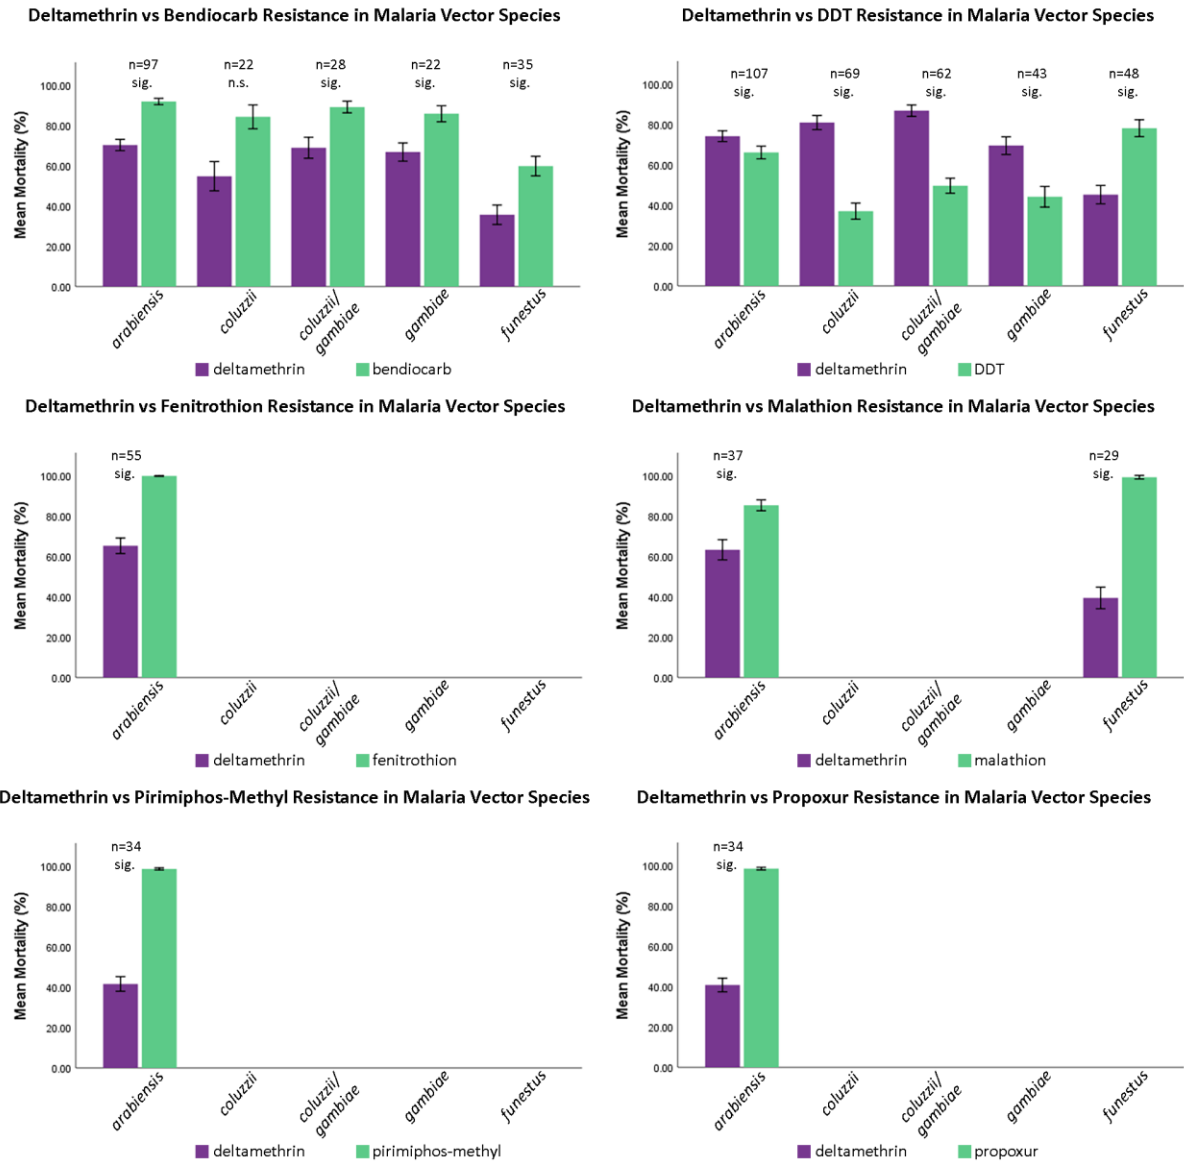

**Figure S9.** Comparison of resistance to deltamethrin and six insecticides from other classes. Two species, *An. coluzzii* and *An. gambiae*, were previously classified as one and results for this former species are entitled '*coluzzii/gambiae*'. Significant results (at the 0.05 level with a Holm-Bonferroni correction) from a paired-sample t-test are denoted 'sig.', non-significant results are denoted 'n.s.', and 'n' is the number of pairs in each set.
